# Supplementary material
Source: PubMed Central journal article supplement (PMC2810657)
Supplement: NIHMS168861-supplement-URLs_and_configurations.pdf [file NIHMS168861-supplement-URLs_and_configurations.pdf]

# Supplementary Information

---

For “DirecTag: accurate sequence tags from peptide MS/MS through statistical scoring”

David L. Tabb<sup>1,2,3,4</sup>, Ze-Qiang Ma<sup>4</sup>, Daniel B. Martin<sup>5</sup>, Amy-Joan L. Ham<sup>2,4</sup>, Matthew C. Chambers<sup>2,3</sup>

- 1 Corresponding author: (phone) 615-936-0380; (fax) 615-343-8372; (email) [david.l.tabb@vanderbilt.edu](mailto:david.l.tabb@vanderbilt.edu)
- 2 Mass Spectrometry Research Center, Vanderbilt University Medical Center, 37232-8575
- 3 Department of Biomedical Informatics, Vanderbilt University Medical Center, 37232
- 4 Department of Biochemistry, Vanderbilt University Medical Center, 37232
- 5 Institute for Systems Biology, Fred Hutchinson Cancer Research Center, 98103

## URLs for data used in the paper

### VUMC websites

- [Tabb group website: source and binaries](#)
  - <http://fenchurch.mc.vanderbilt.edu/>
- [Mass Spectrometry Research Center](#)
  - <http://www.mc.vanderbilt.edu/msrc/>

### Sub-score evaluation data sets

- [VUMC Human gastric vesicles](#)
  - <http://www.mc.vanderbilt.edu/msrc/bioinformatics/data.php>
- [UMich Aurum human protein digests](#)
  - <http://www.proteomecommons.org/data/show.jsp?id=90>
- [ORNL R. palustris lysates](#)
  - [https://compbio.ornl.gov/mspipeline/raw\\_files/biofilm\\_amd/](https://compbio.ornl.gov/mspipeline/raw_files/biofilm_amd/)

### Algorithm reproducibility data sets

- [FHCRC Depleted human serum digest replicates](#)
  - <http://www.proteomecommons.org/data/show.jsp?id=2938>
- [VUMC Yeast lysate instrument tests](#)
  - <http://www.mc.vanderbilt.edu/msrc/bioinformatics/data.php>

### Multiplatform algorithm performance data sets

- [ISB 18-protein cross-platform replicates](#)
  - <http://regis-web.systemsbiology.net/PublicDatasets/>

## **DirectTag configurations**

### **LTQ/LTQ configuration:**

FragmentMzTolerance = 0.5  
ComplementMzTolerance=0.5  
IsotopeMzTolerance = 0.25  
PrecursorMzTolerance = 1.25  
UseAvgMassOfSequences = true  
TicCutoffPercentage = 1  
MaxPeakCount = 100  
MaxTagCount = 50  
MaxTagScore = 0  
UseChargeStateFromMS = 0  
DeisotopingMode = 1  
ContextScoreWeight = 0  
UseMultipleProcessors = 1  
OnLongestPathScoreWeight = 0  
StaticMods = C 57.0215  
ComplementScoreWeight = 1  
IntensityScoreWeight = 1  
MzFidelityScoreWeight = 1

### **FTMS/LTQ or Orbi/LTQ changes:**

FragmentMzTolerance = 0.5  
ComplementMzTolerance=0.5  
IsotopeMzTolerance = 0.25  
PrecursorMzTolerance = 0.1  
UseAvgMassOfSequences = false

### **Orbi/Orbi changes:**

FragmentMzTolerance = 0.1  
ComplementMzTolerance=0.1  
IsotopeMzTolerance = 0.05  
PrecursorMzTolerance = 0.1  
UseAvgMassOfSequences = false

### **Quad/TOF and TOF/TOF changes:**

FragmentMzTolerance = 0.25  
ComplementMzTolerance=0.25  
IsotopeMzTolerance = 0.125  
PrecursorMzTolerance = 0.25  
UseAvgMassOfSequences = false

## MyriMatch configurations

### LTQ/LTQ configuration:

CleavageRules = [|[M|K|R . . ]  
DynamicMods = M \* 15.994 (Q! % -17.03 C & 57.0215  
FragmentMzTolerance = 0.5  
PrecursorMzTolerance = 1.25  
TicCutoffPercentage = 0.95  
UseAvgMassOfSequences = 1  
UseChargeStateFromMS = 0  
CalculateRelativeScores = 0

### FTMS/LTQ or Orbi/LTQ changes:

FragmentMzTolerance = 0.5  
PrecursorMzTolerance = 0.1  
UseAvgMassOfSequences = 0  
AdjustPrecursorMass = true  
MinPrecursorAdjustment = -1.008665  
MaxPrecursorAdjustment = 1.008665  
PrecursorAdjustmentStep = 1.008665  
NumSearchBestAdjustments = 3

### Orbi/Orbi changes:

FragmentMzTolerance = 0.1  
PrecursorMzTolerance = 0.1  
UseAvgMassOfSequences = 0  
AdjustPrecursorMass = true  
MinPrecursorAdjustment = -1.008665  
MaxPrecursorAdjustment = 1.008665  
PrecursorAdjustmentStep = 1.008665  
NumSearchBestAdjustments = 3

### Quad/TOF and TOF/TOF changes:

FragmentMzTolerance = 0.25  
PrecursorMzTolerance = 0.25  
UseAvgMassOfSequences = 0  
AdjustPrecursorMass = true  
MinPrecursorAdjustment = -1.008665  
MaxPrecursorAdjustment = 1.008665  
PrecursorAdjustmentStep = 1.008665  
NumSearchBestAdjustments = 3

## Sequest configurations

### Serum (LTQ/LTQ):

```
[SEQUEST]
database_name = /root/20080121-IPIHum3.37-Cntm-reverse.fasta
first_database_name = /root/20080121-IPIHum3.37-Cntm-reverse.fasta
second_database_name =
peptide_mass_tolerance = 2.5
create_output_files = 1 ; 0=no, 1=yes
ion_series = 0 1 1 0.0 1.0 0.0 0.0 0.0 0.0 0.0 1.0 0.0
fragment_ion_tolerance = 0.0 ; leave at 0.0 unless you have real poor data
num_output_lines = 12 ; # peptide results to show
num_description_lines = 12 ; # full protein descriptions to show for top N peptides
num_results = 500 ; # of results to process
show_fragment_ions = 0 ; 0=no, 1=yes
print_duplicate_references = 1 ; 0=no, 1=yes
enzyme_number = 1
diff_search_options = 57.0519 C 15.9994 M
term_diff_search_options = 0.000 0.000 ; c term, n term diff mods
max_num_differential_AA_per_mod = 4 ; max # of modified AA per diff. mod in a peptide
nucleotide_reading_frame = 0 ; 0=proteinDB, 1-6, 7=forward three, 8=reverse three, 9=all six
mass_type_parent = 0 ; 0=average masses, 1=monoisotopic masses
mass_type_fragment = 1 ; 0=average masses, 1=monoisotopic masses
remove_precursor_peak = 0 ; 0=no, 1=yes
ion_cutoff_percentage = 0.0 ; prelim. score cutoff % as a decimal number i.e. 0.30 for 30%
protein_mass_filter = 0 ; enter protein mass min & max value ( 0 for both = unused)
max_num_internal_cleavage_sites = 10 ; maximum value is 5; for enzyme search
match_peak_count = 0 ; number of auto-detected peaks to try matching (max 5)
match_peak_allowed_error = 1 ; number of allowed errors in matching auto-detected peaks
match_peak_tolerance = 1.0 ; mass tolerance for matching auto-detected peaks
partial_sequence =
sequence_header_filter =
```

[No static mass shifts added]

#### [SEQUEST\_ENZYME\_INFO]

|                   |   |       |   |
|-------------------|---|-------|---|
| 0. No_Enzyme      | 0 | -     | - |
| 1. Trypsin_Strict | 1 | KR    | - |
| 2. Trypsin        | 1 | KRLNH | - |

### Yeast (Orbi/LTQ) changes:

```
database_name = /root/20070727-SGD-Cntms-reverse.fasta
first_database_name = /root/20070727-SGD-Cntms-reverse.fasta
peptide_mass_tolerance = 0.1
mass_type_parent = 1 ; 0=average masses, 1=monoisotopic masses
mass_type_fragment = 1 ; 0=average masses, 1=monoisotopic masses
```
